# Supplementary material for: Impacts of Natural Selection on Evolution of Core and Symbiotically Specialized Genes in the Polytypic Species <em>Neorhizobium galegae</em>
Source: Preprints.org preprint supplement (doi:10.20944/preprints202308.1417.v1), 2023-08-21
Supplement: Supplementary file 1 [file supplementary]

**Supplementary**

**Table S1.** Representations (%) of *Neorhizobium galegae* core genes in the clusters identified by the gene nucleotide polymorphism (p-distance) and natural selection (dN/dS) indices (based on analysis of 782 genes which are polymorphic in biovars *orientalis* and *officinalis*).

| Indices | Phenotypes of clusters (introduced in the text) | | | |  |
| --- | --- | --- | --- | --- | --- |
|  | Ori+Off+ | Ori+Off– | Ori–Off+ | Ori–Off– | |
| p-distance | 29,3±1,63 | 14,3±1,25 | 19,6±1,42 | 36,8±1,72 | |
| dN/dS | 18,9±1,40 | 24,4±1,53 | 10,8±1,11 | 45,9±1,78 | |

**Table S2.** GO (Gene Ontology) enrichment (predominance of functional groups) of biovars *orientalis* and *officinalis* (I), 229 genes, *orientalis* (II), 153 genes and *officinalis* (III), 112 genes. The most enriched 10 functional groups of GO are shown, with a polymorphism (p-distance ) value above the average. The last group (IV) *officinalis* and *orientalis*, 288 genes with a polymorphism (p-distance ) value below the average. 782 genes were used in the functional analysis.

| **GO** | **COG** | **All genes** | **Selected** | **Enrichment** | **P. val** | **Description** |
| --- | --- | --- | --- | --- | --- | --- |
| **(I) *orientalis*+*officinalis* (p-distance more than average)** |  | **782** | **229** |  |  |  |
| GO:0009396 | EFH | 6 | 6 | 3.41485 | 0.0005 | folic acid-containing compound biosynthetic process |
| GO:0006040 | FGJM | 6 | 6 | 3.41485 | 0.0003 | amino sugar metabolic process |
| GO:0042559 | EFH | 7 | 6 | 2.92701 | 0.0024 | pteridine-containing compound biosynthetic process |
| GO:0006760 | EFH | 7 | 6 | 2.92701 | 0.0022 | folic acid-containing compound metabolic process |
| GO:0046653 | EFH | 6 | 5 | 2.84571 | 0.0097 | tetrahydrofolate metabolic process |
| GO:0008170 | JS | 6 | 5 | 2.84571 | 0.0121 | N-methyltransferase activity |
| GO:0032508 | L | 5 | 4 | 2.73188 | 0.025 | DNA duplex unwinding |
| GO:0032392 | L | 5 | 4 | 2.73188 | 0.0274 | DNA geometric change |
| GO:0019200 | GQ | 5 | 4 | 2.73188 | 0.0263 | carbohydrate kinase activity |
| GO:0017004 | OS | 5 | 4 | 2.73188 | 0.0254 | cytochrome complex assembly |
| **(II) *orientalis* only (p-distance more than average)** |  | **782** | **153** |  |  |  |
| GO:1901271 | IMS | 5 | 4 | 4.08889 | 0.0058 | lipooligosaccharide biosynthetic process |
| GO:0033293 | CM | 5 | 4 | 4.08889 | 0.0062 | monocarboxylic acid binding |
| GO:0009245 | IMS | 5 | 4 | 4.08889 | 0.0057 | lipid A biosynthetic process |
| GO:0009312 | GIMS | 7 | 5 | 3.65079 | 0.0053 | oligosaccharide biosynthetic process |
| GO:1901269 | IMS | 6 | 4 | 3.40741 | 0.014 | lipooligosaccharide metabolic process |
| GO:0046493 | IMS | 6 | 4 | 3.40741 | 0.0157 | lipid A metabolic process |
| GO:0016791 | EFGIPT | 6 | 4 | 3.40741 | 0.0153 | phosphatase activity |
| GO:0016311 | EFGIPT | 6 | 4 | 3.40741 | 0.0144 | dephosphorylation |
| GO:0009311 | GIMS | 8 | 5 | 3.19444 | 0.0092 | oligosaccharide metabolic process |
| GO:0042578 | EFGIKPST | 10 | 5 | 2.55556 | 0.0273 | phosphoric ester hydrolase activity |
| **(III) *officinalis* only (p-distance more than average)** |  | **782** | **112** |  |  |  |
| GO:0016840 | EF | 5 | 4 | 5.58571 | 0.0015 | carbon-nitrogen lyase activity |
| GO:0043023 | JMS | 5 | 3 | 4.18929 | 0.0248 | ribosomal large subunit binding |
| GO:0009185 | FG | 5 | 3 | 4.18929 | 0.0251 | ribonucleoside diphosphate metabolic process |
| GO:0009179 | FG | 5 | 3 | 4.18929 | 0.023 | purine ribonucleoside diphosphate metabolic process |
| GO:0009135 | FG | 5 | 3 | 4.18929 | 0.0236 | purine nucleoside diphosphate metabolic process |
| GO:0006526 | EF | 7 | 4 | 3.98980 | 0.0112 | arginine biosynthetic process |
| GO:0006525 | EF | 7 | 4 | 3.98980 | 0.0111 | arginine metabolic process |
| GO:0031163 | EOS | 6 | 3 | 3.49107 | 0.0386 | metallo-sulfur cluster assembly |
| GO:0019318 | CGM | 8 | 4 | 3.49107 | 0.0171 | hexose metabolic process |
| GO:0016226 | EOS | 6 | 3 | 3.49107 | 0.0406 | iron-sulfur cluster assembly |
| **(IV) *officinalis* and *orientalis* (p-distance less than average)** |  | **782** | **288** |  |  |  |
| GO:0051085 | O | 5 | 5 | 2.71528 | 0.0066 | chaperone cofactor-dependent protein refolding |
| GO:0051084 | O | 5 | 5 | 2.71528 | 0.0079 | 'de novo' posttranslational protein folding |
| GO:0045259 | C | 5 | 5 | 2.71528 | 0.0076 | proton-transporting ATP synthase complex |
| GO:0044087 | DJKOS | 8 | 8 | 2.71528 | 0.0006 | regulation of cellular component biogenesis |
| GO:0043254 | KO | 5 | 5 | 2.71528 | 0.0069 | regulation of protein-containing complex assembly |
| GO:0042274 | JS | 15 | 15 | 2.71528 | 0.0001 | ribosomal small subunit biogenesis |
| GO:0034249 | JS | 5 | 5 | 2.71528 | 0.0071 | negative regulation of cellular amide metabolic process |
| GO:0022625 | J | 22 | 22 | 2.71528 | 0.0001 | cytosolic large ribosomal subunit |
| GO:0017148 | JS | 5 | 5 | 2.71528 | 0.0074 | negative regulation of translation |
| GO:0016469 | C | 5 | 5 | 2.71528 | 0.0092 | proton-transporting two-sector ATPase complex |

**Table S3.** GO (Gene Ontology) enrichment (predominance of functional groups) of biovars *orientalis* (646 genes) and *officinalis* (623 genes). The most enriched 10 functional groups of GO with a dN/dS ratio less than one (stabilizing selection) are shown. 782 genes were used in the functional analysis.

| **GO** | **All genes** | **Selected** | **Enrchment** | **P. val** | **dN/dS** | **StDev** | **Description** |
| --- | --- | --- | --- | --- | --- | --- | --- |
| ***Orientalis*** | **782** | **646** |  |  |  |  |  |
| GO:0098797 | 17 | 17 | 1,21 | 0,0372 | 0,403 | 0,252 | plasma membrane protein complex |
| GO:0097659 | 18 | 18 | 1,21 | 0,0302 | 0,291 | 0,249 | nucleic acid-templated transcription |
| GO:0046031 | 4 | 4 | 1,21 | 0,0001 | 0,438 | 0,287 | ADP metabolic process |
| GO:0032774 | 18 | 18 | 1,21 | 0,0336 | 0,291 | 0,249 | RNA biosynthetic process |
| GO:0009124 | 16 | 16 | 1,21 | 0,0448 | 0,38 | 0,266 | nucleoside monophosphate biosynthetic process |
| GO:0007154 | 19 | 19 | 1,21 | 0,0282 | 0,394 | 0,191 | cell communication |
| GO:0006351 | 18 | 18 | 1,21 | 0,031 | 0,291 | 0,249 | transcription, DNA-templated |
| GO:0006091 | 31 | 30 | 1,17 | 0,0193 | 0,437 | 0,262 | generation of precursor metabolites and energy |
| GO:0016874 | 44 | 41 | 1,13 | 0,0387 | 0,426 | 0,222 | Ligase activity |
| GO:0005515 | 102 | 95 | 1,13 | 0,0007 | 0,407 | 0,216 | protein amino acid binding, glycoprotein binding |
| ***Officinalis*** | **782** | **623** |  |  |  |  |  |
| GO:0072330 | 18 | 18 | 1,26 | 0,0153 | 0,574 | 0,262 | monocarboxylic acid biosynthetic process |
| GO:0071826 | 31 | 31 | 1,26 | 0,0008 | 0,366 | 0,101 | ribonucleoprotein complex subunit organization |
| GO:0070925 | 31 | 31 | 1,26 | 0,0003 | 0,369 | 0,103 | organelle assembly |
| GO:0046364 | 6 | 6 | 1,26 | 0,0001 | 0,475 | 0,164 | monosaccharide biosynthetic process |
| GO:0042886 | 14 | 14 | 1,26 | 0,0393 | 0,399 | 0,283 | amide transport |
| GO:0042274 | 15 | 15 | 1,26 | 0,0313 | 0,455 | 0 | ribosomal small subunit biogenesis |
| GO:0042273 | 14 | 14 | 1,26 | 0,0428 | 0,224 | 0 | ribosomal large subunit biogenesis |
| GO:0042255 | 30 | 30 | 1,26 | 0,0011 | 0,34 | 0,115 | ribosome assembly |
| GO:0033036 | 16 | 16 | 1,26 | 0,0245 | 0,349 | 0,234 | macromolecule localization |
| GO:0022618 | 30 | 30 | 1,26 | 0,0009 | 0,34 | 0,115 | ribonucleoprotein complex assembly |

**Table S4.** GO (Gene Ontology) enrichment (predominance of functional groups) of biovars *orientalis* (136 genes) and *officinalis* (159 genes). The most enriched 10 functional groups of GO with dN/dS ratio greater than one (driving selection) are shown. 782 genes participated in the functional analysis.

| **GO** | **All genes** | **Selected** | **Enrichment** | **P. val** | **dN/dS** | **StDev** | **Description** |
| --- | --- | --- | --- | --- | --- | --- | --- |
| ***Orientalis*** | **782** | **136** |  |  |  |  |  |
| GO:0019584 | 3 | 3 | 5.75 | 0.0053 | 3.383 | 2.957 | galactonate catabolic process |
| GO:0019583 | 3 | 3 | 5.75 | 0.0050 | 3.383 | 2.957 | galactonate metabolic process |
| GO:0016855 | 6 | 5 | 4.79 | 0.0008 | 1.585 | 0.359 | racemase and epimerase activity, acting on amino acids and derivatives |
| GO:0047661 | 5 | 4 | 4.6 | 0.0039 | 1.595 | 0.401 | L-amino acid racemase activity |
| GO:0036361 | 5 | 4 | 4.6 | 0.0032 | 1.595 | 0.401 | racemase activity, acting on amino acids and derivatives |
| GO:0046176 | 4 | 3 | 4.31 | 0.0186 | 3.383 | 2.957 | aldonic acid catabolic process |
| GO:0019520 | 4 | 3 | 4.31 | 0.0195 | 3.383 | 2.957 | aldonic acid metabolic process |
| GO:0009103 | 4 | 3 | 4.31 | 0.0199 | 1.676 | 0.408 | lipopolysaccharide biosynthetic process |
| GO:0016854 | 10 | 7 | 4.02 | 0.0001 | 1.536 | 0.376 | racemase and epimerase activity |
| GO:0009074 | 5 | 3 | 3.45 | 0.0419 | 3.6 | 3.606 | aromatic amino acid family catabolic process |
| ***Officinalis*** | **782** | **159** |  |  |  |  |  |
| GO:0019584 | 3 | 3 | 4.92 | 0.0085 | 2.073 | 0.486 | galactonate catabolic process |
| GO:0019583 | 3 | 3 | 4.92 | 0.0079 | 2.073 | 0.486 | galactonate metabolic process |
| GO:0046176 | 4 | 3 | 3.69 | 0.0287 | 2.073 | 0.486 | aldonic acid catabolic process |
| GO:0019520 | 4 | 3 | 3.69 | 0.0279 | 2.073 | 0.486 | aldonic acid metabolic process |
| GO:0006749 | 4 | 3 | 3.69 | 0.0258 | 2.694 | 1.432 | glutathione metabolic process |
| GO:0008168 | 19 | 9 | 2.33 | 0.0082 | 1.595 | 0.57 | molecular_function |
| GO:0008757 | 17 | 8 | 2.31 | 0.0126 | 1.564 | 0.597 | S-adenosylmethionine-dependent methyltransferase activity |
| GO:0019842 | 13 | 6 | 2.27 | 0.0295 | 1.924 | 0.682 | vitamin binding |
| GO:0006400 | 18 | 8 | 2.19 | 0.0150 | 1.505 | 0.394 | tRNA modification |
| GO:0016616 | 16 | 7 | 2.15 | 0.0264 | 2.713 | 1.051 | oxidoreductase activity, acting on the CH-OH group of donors, NAD or NADP as acceptor |

**Table S5.** Frequencies (F) of Gene Ontology Groups (GOGs) with high dN/dS values among GOGs with high or low p-distance values

| Biovars | p-distances in the compared GOGs | | | | tSt (P0)* |
| --- | --- | --- | --- | --- | --- |
| High-in-High | | Low-in-High | |
| N (n) | F = n/N | N (n) | F = n/N |
| *Orientalis* | 31 (11) | 0,35±0,09 | 45 (1) | 0,02±0,02 | 3,58 (< 0,01) |
| *Officinalis* | 47 (9) | 0,19±0,06 | 29 (4) | 0,16±0,07 | 0,32 (> 0,10) |

N – numbers of GOGs with high or low p-distance values identified in different biovars; n – numbers of GOGs with high dN/dS values (N and n values are calculated from Table 3).

*Students criterion values and probabilities of null-hypothesis are given for F value comparisons.

**Table S6.** Frequencies (F) of Gene Ontology Groups (GOGs) with high p-distance values among GOGs with high or low dN/dS values

| Biovars | dN/dS in the compared GOGs | | | | tSt (P0)* |
| --- | --- | --- | --- | --- | --- |
| High-in-High | | Low-in-High | |
| N (n) | F = n/N | N (n) | F = n/N |
| *Orientalis* | 12 (11) | 0,92±0,08 | 64 (20) | 0,31±0,06 | 6,10 (< 0,01) |
| *Officinalis* | 13 (9) | 0,69±0,13 | 63 (38) | 0,60±0,06 | 0,33 (> 0,10) |

N – numbers of GOGs with high or low dN/dS values identified in different biovars; n – numbers of GOGs with high p-distance values (N and n values are calculated from Table 3).

*Students criterion values and probabilities of null-hypothesis are given for F value comparisons.
